# Supplementary material for: Prognostic significance and function of the vacuolar H+-ATPase subunit V1E1 in esophageal squamous cell carcinoma
Source: PubMed Central journal article supplement (PMC5226512; doi:10.18632/oncotarget.10340), 2016-06-30
Supplement: oncotarget-07-49334-s001.pdf [file oncotarget-07-49334-s001.pdf]

## Prognostic significance and function of the vacuolar H<sup>+</sup>-ATPase subunit V1E1 in esophageal squamous cell carcinoma

### Supplementary Materials

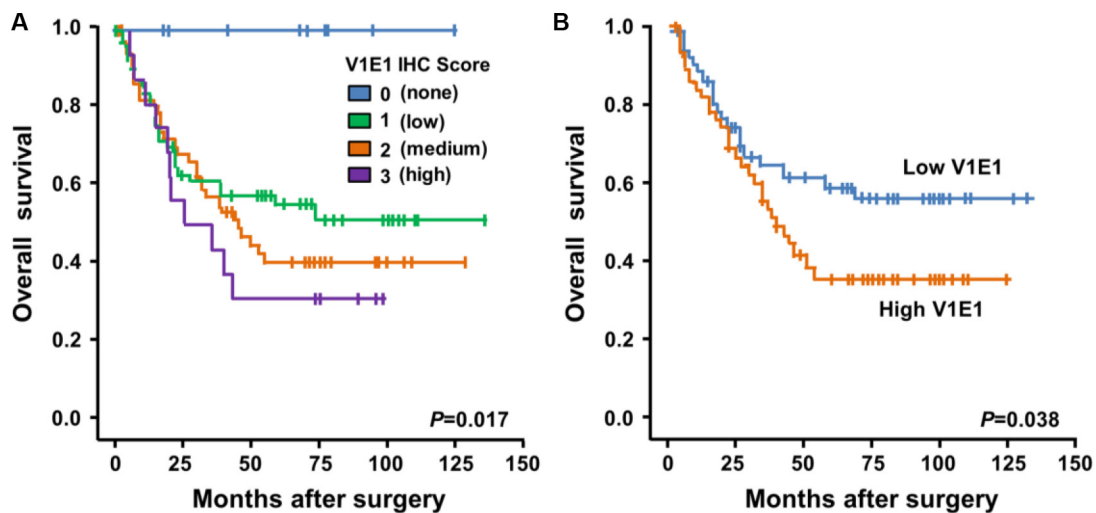

**Supplementary Figure S1: Kaplan-Meier survival curves for overall survival according to the results of V-ATPase V1E1 immunostaining.** (A) Kaplan-Meier curves showing overall survival among patients with ESCC on the basis of V-ATPase V1E1 expression status; (IHC score = 0,  $n = 12$ ; IHC score = 1,  $n = 72$ ; IHC score = 2,  $n = 60$ ; IHC score = 3,  $n = 16$ ). (B) Overall survival among patients with ESCC on the basis of V-ATPase V1E1 expression status; low V-ATPase V1E1 (IHC score < 2,  $n = 84$ ) and high V-ATPase V1E1 (IHC score  $\geq 2$ ,  $n = 76$ ).  $P$  values are from Log-Rank test.

**Supplementary Table S1: Patients characteristics**

| <b>Characteristics</b>           | <b>Case no.(n = 302)</b> | <b>%</b> |
|----------------------------------|--------------------------|----------|
| <b><i>Age</i></b>                |                          |          |
| ≥ 65 years                       | 269                      | 89       |
| < 65 years                       | 33                       | 11       |
| <b><i>Sex</i></b>                |                          |          |
| Male                             | 286                      | 95       |
| Female                           | 16                       | 5        |
| <b><i>Tumor size</i></b>         |                          |          |
| ≥ 4.0 cm                         | 110                      | 36       |
| < 4.0 cm                         | 192                      | 64       |
| <b><i>Differentiation</i></b>    |                          |          |
| W/D                              | 61                       | 21       |
| M/D                              | 185                      | 61       |
| P/D                              | 56                       | 18       |
| <b><i>TNM Stage</i></b>          |                          |          |
| I                                | 55                       | 18       |
| II                               | 87                       | 29       |
| III                              | 109                      | 36       |
| IV                               | 51                       | 17       |
| <b><i>Tumor invasion</i></b>     |                          |          |
| T1                               | 61                       | 20       |
| T2                               | 52                       | 17       |
| T3                               | 181                      | 60       |
| T4                               | 8                        | 3        |
| <b><i>LN metastasis</i></b>      |                          |          |
| Negative                         | 120                      | 40       |
| Positive                         | 182                      | 60       |
| <b><i>Distant metastasis</i></b> |                          |          |
| Absent                           | 249                      | 82       |
| Positive                         | 53                       | 18       |

**Supplementary Table S2: Primers used for quantitative PCR**

| <b>Primer name</b>      | <b>sequence</b>                      |
|-------------------------|--------------------------------------|
| <b>hV-ATPase V1E1 F</b> | 5'-GCA CAA GCC GAC CTT TCT-3'        |
| <b>hV-ATPase V1E1 R</b> | 5'-TTC ACC GGC CTA GCA TTG -3'       |
| <b>hHIF-1a F</b>        | 5'-CGT TCC TTC GAT CAG TTG TC-3'     |
| <b>hHIF-1a R</b>        | 5'-TCA GTG GTG GCA GTG GTA GT-3'     |
| <b>hGlut1-F</b>         | 5'-CGG GCC AAG AGT GTG CTA AA-3'     |
| <b>hGlut1-R</b>         | 5'-TGA CGA TAC CGG AGC CAA TG-3'     |
| <b>hHK1-F</b>           | 5'-TGG AGT CCG AGG TTT ATG-3'        |
| <b>hHK1-R</b>           | 5'-TTT GGA TTG TTG GCA AGG-3'        |
| <b>hPFK F</b>           | 5'-CAT GAC CCA TGA AGA GCA CC-3'     |
| <b>hPFK R</b>           | 5'-CCA ACT CGA ACC ACA GCC CTG-3'    |
| <b>hENO1 F</b>          | 5'-CGT ACC GCT TCC TTA GAA C-3'      |
| <b>hENO1 R</b>          | 5'-CAA TGA CTT GGG CCA ATT AC-3'     |
| <b>hPKM2-F</b>          | 5'-GCC TGC TGT GTC GGA GAA G-3'      |
| <b>hPKM2-R</b>          | 5'-CTC TCC CAG GAC CTT CCT AA-3'     |
| <b>hLDHA-F</b>          | 5'-ATC TTG ACC TAC GTG GCT TGG A-3'  |
| <b>hLDHA-R</b>          | 5'-CCA TAC AGG CAC ACT GGA ATC TC-3' |
| <b>hVimentin F</b>      | 5'-GGG ACC TCT ACG AGG AGG AG-3'     |
| <b>hVimentin R</b>      | 5'-CGC ATT GTC AAC ATC CTG TC-3'     |
| <b>hMMP2 F</b>          | 5'-CCA CTG CCT TCG ATA CAC-3'        |
| <b>hMMP2 R</b>          | 5'-GAG CCA CTC TCT GGA ATC TTA AA-3' |
| <b>hMMP7 F</b>          | 5'-GAG TGA GCT ACA GTG GGA ACA-3'    |
| <b>hMMP7 R</b>          | 5'-CTA TGA CGC GGG AGT TTA ACA T-3'  |
| <b>h18s rRNA F</b>      | 5'-CGG CGA CGA CCC ATT CGA AC-3'     |
| <b>h18s rRNA R</b>      | 5'-GAA TCG AAC CCT GAT TCC CCG TC-3' |
